# Supplementary material
Source: Springer Nature journal article supplement (https://www.springermedizin.de/resource/supplementary/12889_2011_3758_MOESM1_ESM.pdf/9491172)

**1a: Back pain complaints**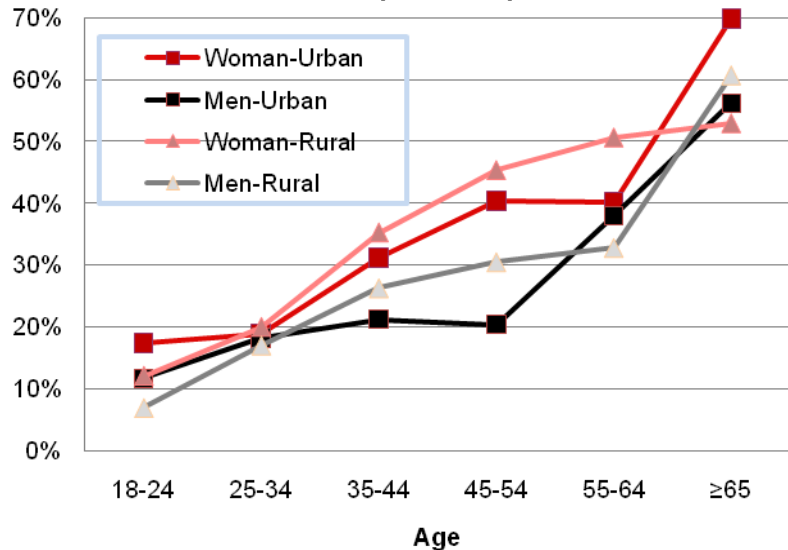**1b: Joint disease symptoms**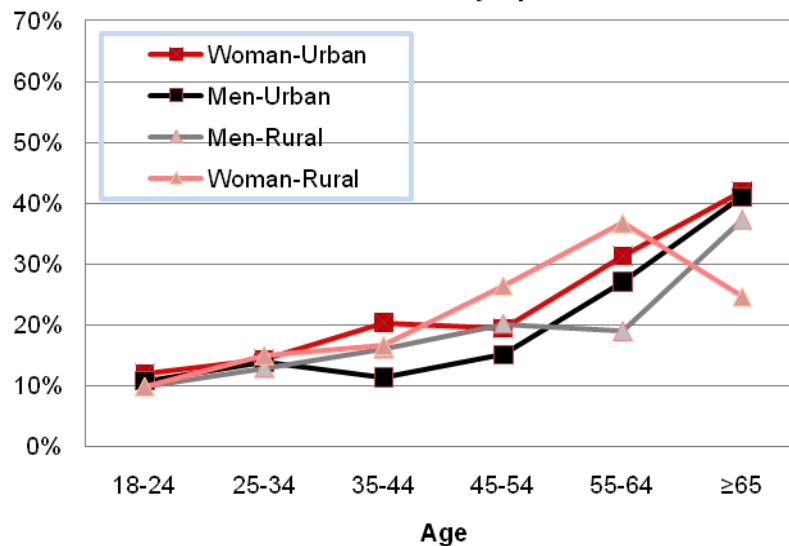**1c: Angina pectoris symptoms**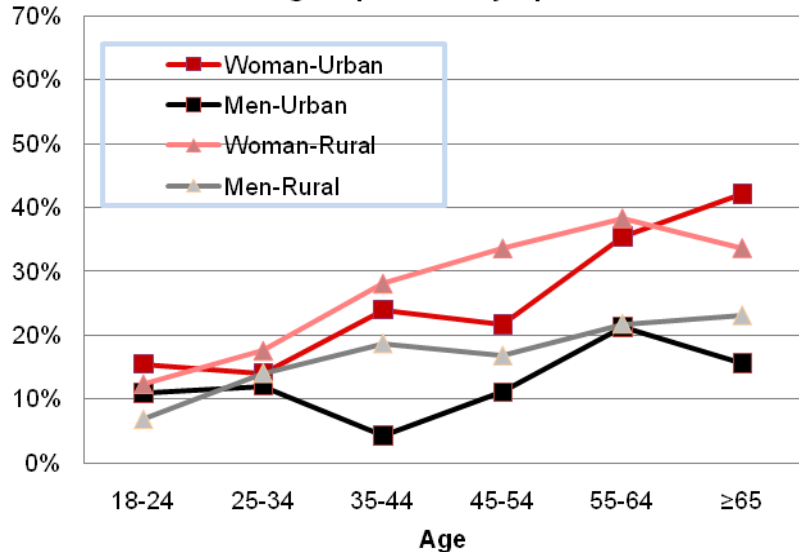**1d: Asthma symptoms**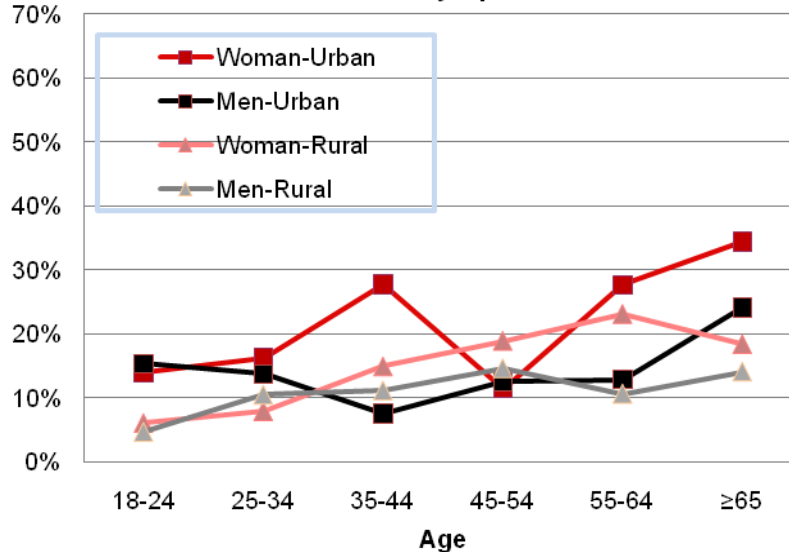

Supplement: MOESM1 [file 9491172]
